# Supplementary material
Source: PubMed Central journal article supplement (PMC2515361)
Supplement: NIHMS60853-supplement-si20050910_040.pdf [file NIHMS60853-supplement-si20050910_040.pdf]

**Supplementary Information for**  
**"Relatively small increases in the steady-state levels of nucleobase**  
**deamination products in DNA from human TK6 cells exposed to toxic levels**  
**of nitric oxide"**

Min Dong and Peter C. Dedon

• **Figure S1.** LC/MS analyses of synthetic U- $^{13}\text{C}/^{15}\text{N}$ -dG, -dA and -dC. Figure S1 shows total ion chromatograms for uniformly  $^{13}\text{C}$ ,  $^{15}\text{N}$ -labeled dA, dG and dC prepared by dephosphorylation of their corresponding 5'-triphosphate deoxyribose nucleotide precursors, which include the molecular ions and their depurinated nucleobase products.

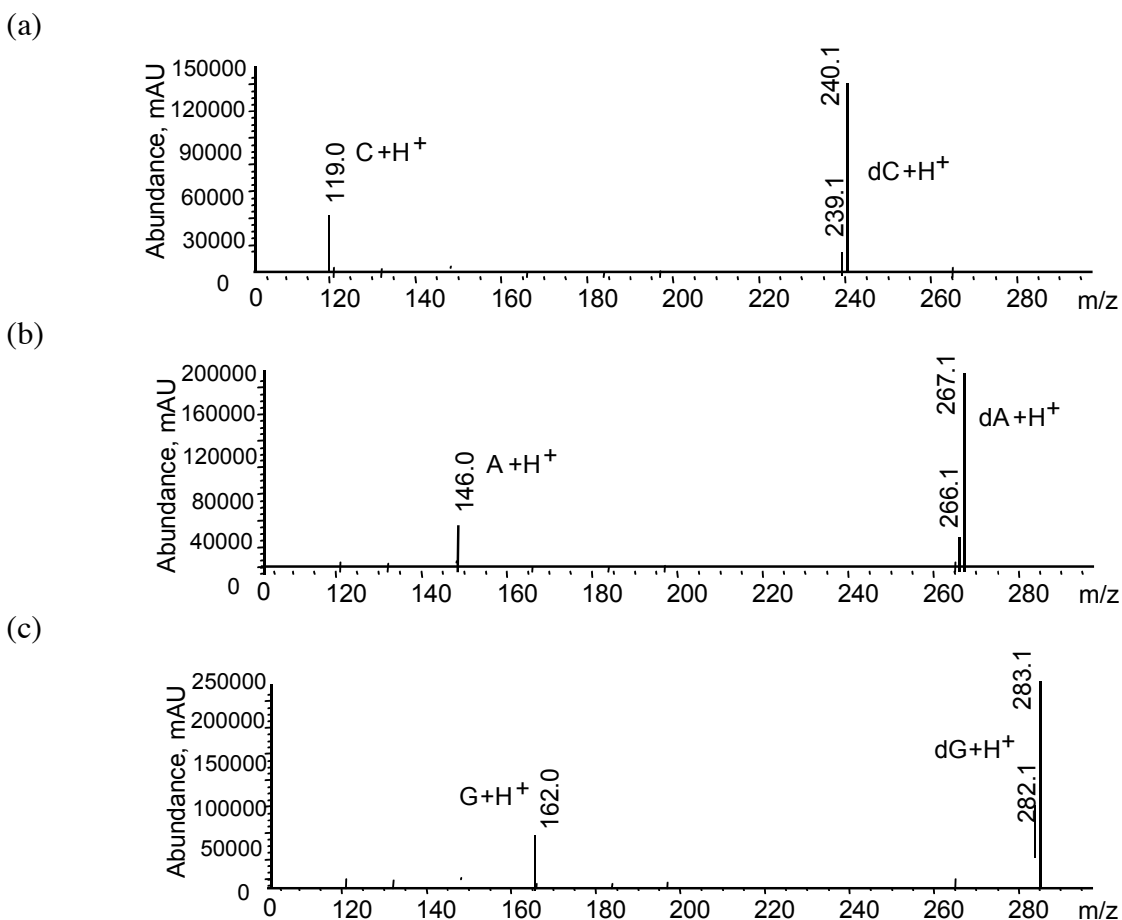

**Figure S1.** Characterization of synthetic  $^{13}\text{C}_8\ ^{15}\text{N}_2$ -labeled 2'-deoxynucleoside standards by electrospray ionization mass spectrometry (positive ion mode).  $^{13}\text{C}_8\ ^{15}\text{N}_2$ -labeled dC (a) and  $^{13}\text{C}_{11}\ ^{15}\text{N}_4$ -labeled dA, dG (b and c). The  $m/z$  values of each double-labeled 2'-deoxynucleoside and free base are as follows: 239.1 for  $^{13}\text{C}_8\ ^{15}\text{N}_2$ -dC and 118.0 for  $^{13}\text{C}_3\ ^{15}\text{N}_2$ -C; 266.1 for  $^{13}\text{C}_{11}\ ^{15}\text{N}_4$ -dA and 145.0 for  $^{13}\text{C}_5\ ^{15}\text{N}_4$ -A; 282.1 for  $^{13}\text{C}_{11}\ ^{15}\text{N}_4$ -dG and 161.0 for  $^{13}\text{C}_5\ ^{15}\text{N}_4$ -G.

• **Figure S2.** Electrospray ionization LC/MS (selected ion mode) analysis of the formation of  $^{13}\text{C}_{10}^{15}\text{N}_4$ -dX, dO and dI and  $^{13}\text{C}_8^{15}\text{N}_2$ -dU from the corresponding double-labeled forms of dG, dA and dU, respectively.

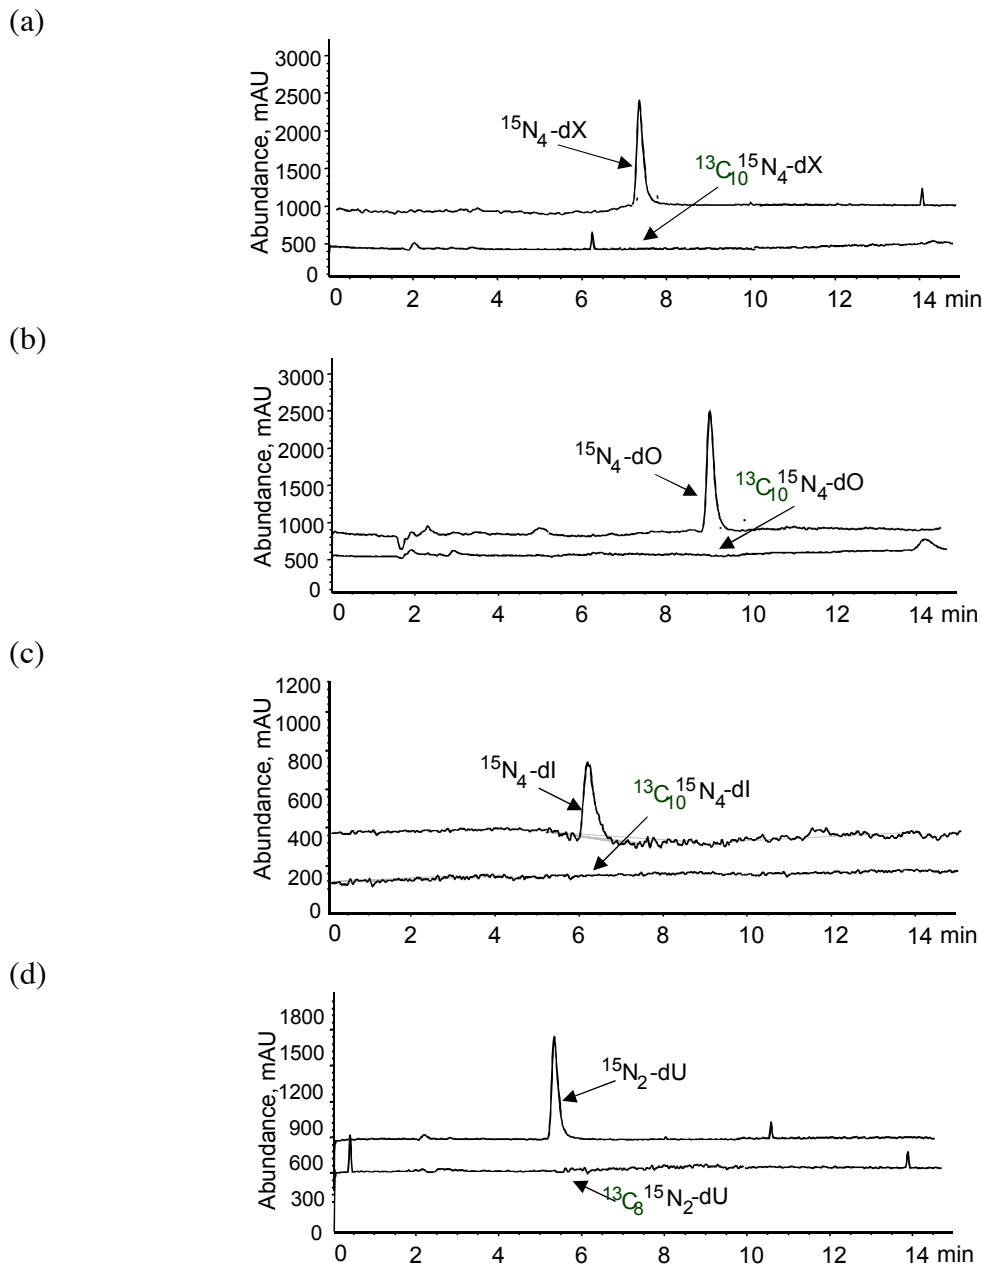

**Figure S2.** Electrospray ionization LC/MS (selected ion monitoring) analysis of the formation of  $^{13}\text{C}_{10}^{15}\text{N}_4$ -dX, -dO and -dI and  $^{13}\text{C}_8^{15}\text{N}_2$ -dU from the corresponding double-labeled forms of dG, dA and dU, respectively.  $^{15}\text{N}$ -labeled 2'-deoxynucleosides served as the internal standards for quantification. Analyses were performed with the following molecular ions in positive ion mode (except dU): (a)  $^{13}\text{C}_{10}^{15}\text{N}_4$ -X,  $m/z$  162 and  $^{15}\text{N}_4$ -X,  $m/z$  157; (b)  $^{13}\text{C}_{10}^{15}\text{N}_4$ -dO,  $m/z$  162 and  $^{15}\text{N}_4$ -dO,  $m/z$  157; (c)  $^{13}\text{C}_{10}^{15}\text{N}_4$ -dI,  $m/z$  146 and  $^{15}\text{N}_4$ -dI,  $m/z$  141; and (d)  $^{13}\text{C}_8^{15}\text{N}_2$ -dU at  $m/z$  237 and  $^{15}\text{N}_2$ -dU at  $m/z$  229 in negative ion mode.
